# Supplementary material
Source: publisher figshare collection journal article supplement (https://karger.figshare.com/ndownloader/files/18800642)

## Supplementary Material

### Search Strategy

("diabetes mellitus, type 2"[MeSH] OR diabetes mellitus type 2[tiab] OR type 2 diabetes mellitus[tiab] AND (canagliflozin[tiab] OR empagliflozin[tiab] OR dapagliflozin[tiab]) AND (rand\*[tw] OR trial [tiab]) AND ("myocardial infarction"[MeSH] OR myocardial infarction[tiab] OR "stroke"[MeSH] OR stroke[tiab] OR MACE[tiab] OR major adverse cardiovascular event[tiab] OR major adverse cardiac event[tiab] OR "death"[MeSH] OR death[tiab] OR mortality [tiab] OR "heart failure"[MeSH] OR heart failure[tiab]). The search strategy for Cochrane library (type 2 diabetes mellitus OR diabetes mellitus type 2 OR type 2 diabetes):ti,ab,kw AND (empagliflozin OR dapagliflozin OR canagliflozin):ti,ab,kw AND (myocardial infarction OR stroke OR heart failure OR death OR mortality OR MACE OR major adverse cardiac events OR major adverse cardiovascular events):ti,ab,kw AND ("randomized controlled trial" OR randomized clinical trial OR RCT OR trial):pt".

**Supplementary Figure 1: Prisma Flow Diagram of the Meta -Analysis**

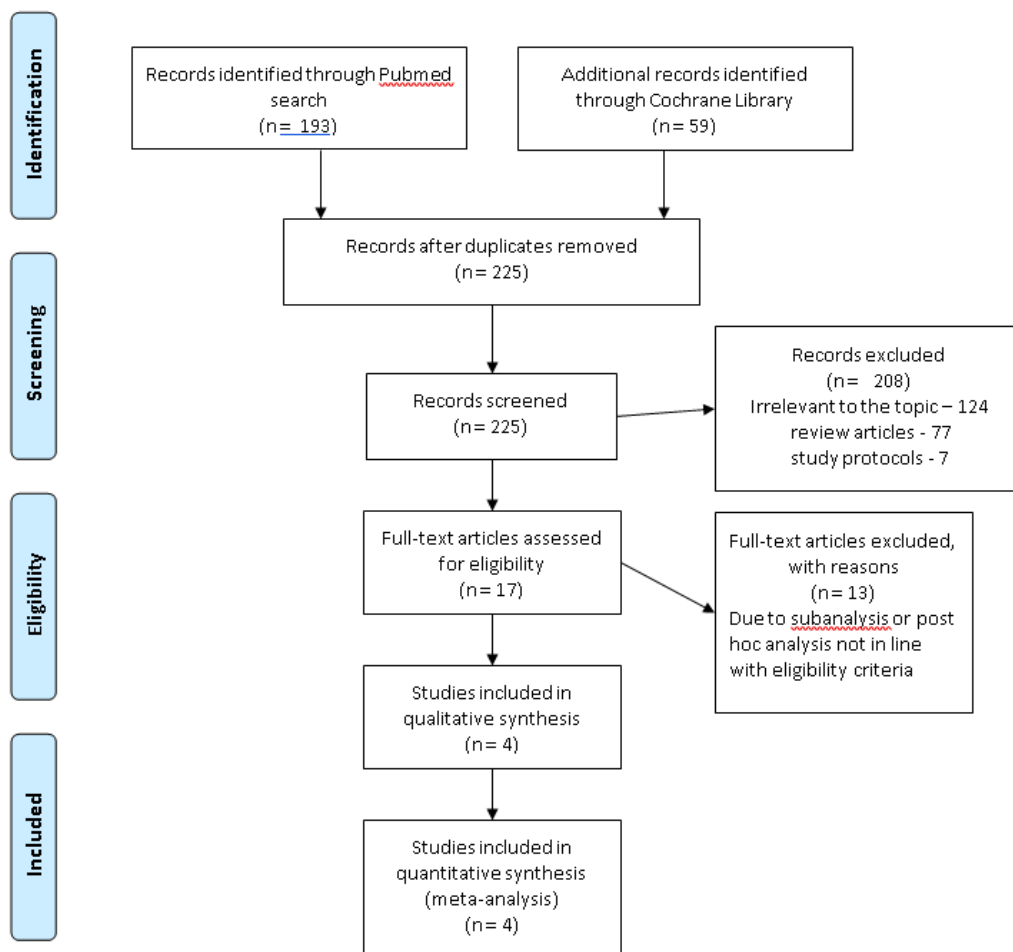

**Supplementary Table 1. Studies included in the meta-analysis**

| Study (n)                  | Study drug & Level of evidence ‡ | Study population                                                                                                                                                                                                                                                                                                                                                                                                                                                           | Median follow-up time (years) | Cardiovascular composite outcome                               | Renal composite outcome                                                                              |
|----------------------------|----------------------------------|----------------------------------------------------------------------------------------------------------------------------------------------------------------------------------------------------------------------------------------------------------------------------------------------------------------------------------------------------------------------------------------------------------------------------------------------------------------------------|-------------------------------|----------------------------------------------------------------|------------------------------------------------------------------------------------------------------|
| EMPA-REG OUTCOME (n=7020)  | Empa-gliflozin<br>1              | -≥18 years of age with type 2 DM<br>-BMI ≤45<br>-eGFR ≥30 ml/min./1.73 m <sup>2</sup><br>(mean study eGFR = 74 ml/min./1.73 m <sup>2</sup> )<br><br>All the patients had established cardiovascular disease (hx of MI, UA, CVA, documented CAD, PAD)                                                                                                                                                                                                                       | 3.1                           | Death from cardiovascular causes, nonfatal MI, nonfatal stroke | Doubling of serum creatinine, initiation of renal replacement therapy, or death due to renal disease |
| CANVAS (n=10,142)          | Cana-gliflozin<br>1              | -≥30 years of age with type 2 DM<br>-eGFR ≥30 ml/min./1.73 m <sup>2</sup><br>(mean study eGFR = 76 ml/min./1.73 m <sup>2</sup> )<br>-with history of symptomatic atherosclerotic cardiovascular disease<br>Or<br>-≥50 years of age with 2 or more of the following risk factors: diabetes>10 years, systolic blood pressure >140mmHg while receiving antihypertensive agents, smoking, micro or macroalbuminuria, HDL <1mmol/L, 65% had established cardiovascular disease | 2.4                           | Death from cardiovascular causes, nonfatal MI, nonfatal stroke | 40% decrease in eGFR, renal death or renal replacement therapy requirement                           |
| DECLARE-TIMI 58 (n=17,160) | Dapa-gliflozin<br>1              | -≥40 years of age with type 2 DM<br>-eGFR ≥60 ml/min./1.73 m <sup>2</sup><br>(mean study eGFR = 85 ml/min./1.73 m <sup>2</sup> )<br>-established cardiovascular disease (evidence of CAD, CVA, PAD)<br>Or<br>-men ≥55 or women ≥60 with one or more of the following: (Hypertension, dyslipidemia, tobacco use)<br>40% had established cardiovascular disease                                                                                                              | 4.2                           | Death from cardiovascular causes, nonfatal MI, nonfatal stroke | 40% decrease in eGFR, ESRD, or renal death                                                           |
| CREDENCE 2019 (n=4,401)    | Cana-gliflozin<br>1              | -≥30 years of age with type 2 DM<br>-CKD eGFR 30 to 90 ml/min./1.73 m <sup>2</sup><br>(mean study eGFR = 56 ml/min./1.73 m <sup>2</sup> )<br>-albuminuria (urinary albumin-to-creatinine ratio, ≥300 to 5000 mg/g)<br>-on maximum tolerated dose of ACEi/ARB at least 4 weeks prior<br>50% had established cardiovascular disease (no definitions)                                                                                                                         | 2.6                           | Death from cardiovascular causes, nonfatal MI, nonfatal stroke | End stage kidney disease, doubling of serum creatinine, renal death                                  |

\*\*MI – myocardial infarction, eGFR – estimated glomerular filtration rate, ESRD – end stage renal disease, ACEi – angiotensin converting enzyme inhibitor, ARB – angiotensin receptor blocker, CKD – chronic kidney disease, DM – diabetes mellitus, BMI – body mass index, CAD – coronary artery disease, UA – unstable angina, CVA – cerebrovascular accident, PAD – peripheral arterial disease, †Level of evidence: 1-systematic review and meta-analysis or properly powered and conducted randomized clinical trial, 2 - Well-designed controlled trial without randomization; prospective comparative cohort trial, 3 - Case-control studies; retrospective cohort study, 4 - Case series with or without intervention; cross-sectional study, 5 - Opinion of respected authorities; case reports

Supplementary Figure 2. Risk of bias summary

|                  | Random sequence generation (selection bias) | Allocation concealment (selection bias) | Blinding of participants and personnel (performance bias) | Blinding of outcome assessment (detection bias) | Incomplete outcome data (attrition bias) | Selective reporting (reporting bias) | Other bias |
|------------------|---------------------------------------------|-----------------------------------------|-----------------------------------------------------------|-------------------------------------------------|------------------------------------------|--------------------------------------|------------|
| CANVAS           |                                             |                                         |                                                           |                                                 |                                          |                                      |            |
| CREDENCE         |                                             |                                         |                                                           |                                                 |                                          |                                      |            |
| DECLARE-TIMI 58  |                                             |                                         |                                                           |                                                 |                                          |                                      |            |
| EMPA-REG OUTCOME |                                             |                                         |                                                           |                                                 |                                          |                                      |            |

\*green circles- low risk of bias, yellow circles – uncertain or moderate risk of bias, red – high risk of bias

**Supplementary Figure 3. Forest plot for all-cause mortality in patients with type 2 diabetes with either established cardiovascular disease or cardiovascular risk factors**

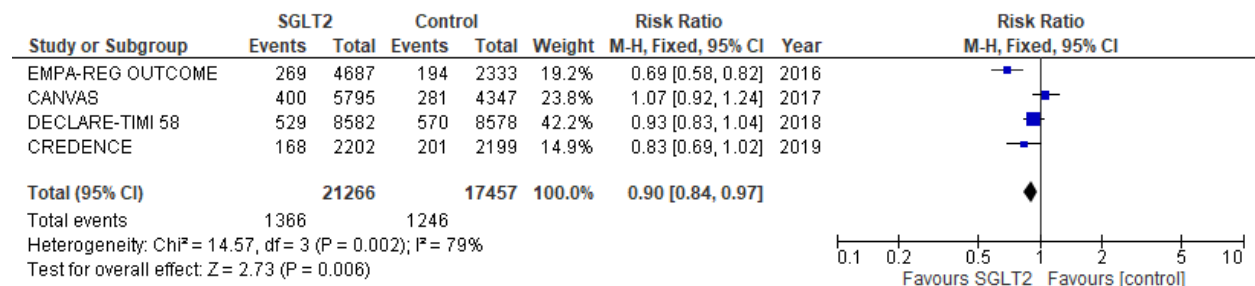

**Supplementary Figure 4. Forest plot for death from cardiovascular causes alone in patients with type 2 diabetes with either established cardiovascular disease or cardiovascular risk factors**

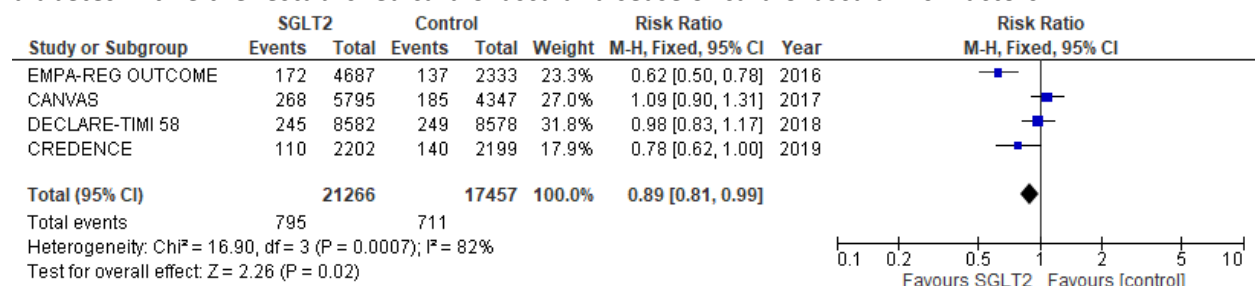

**Supplementary Figure 5. Forest plot for death from cardiovascular causes alone in patients with eGFR <60 ml/min/1.73m2 with type 2 diabetes with either established cardiovascular disease or cardiovascular risk factors**

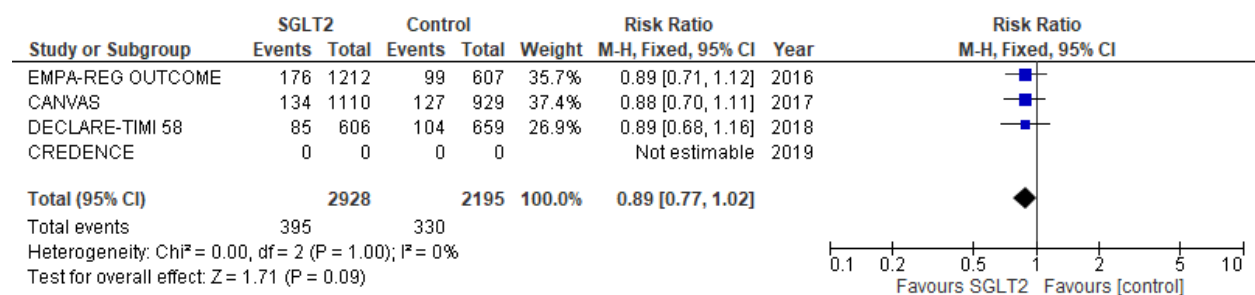

**Supplementary Figure 6. Forest plot for heart failure hospitalization in patients with type 2 diabetes with either established cardiovascular disease or cardiovascular risk factors**

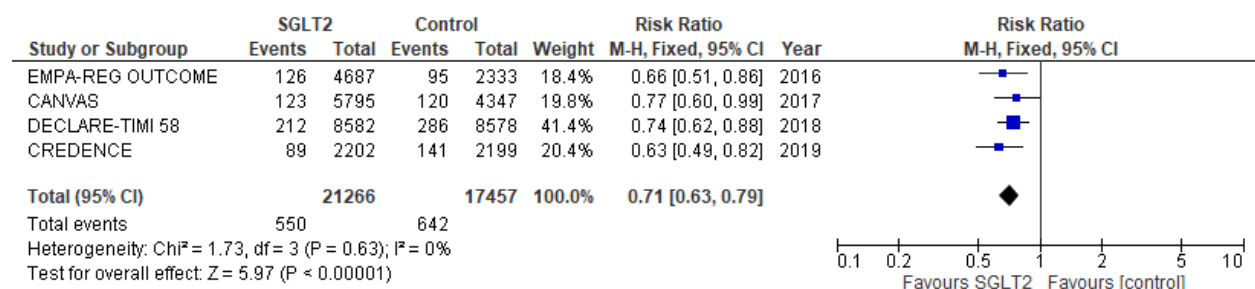

**Supplementary Figure 7. Forest plot for progression of albuminuria in patients with type 2 diabetes with either established cardiovascular disease or cardiovascular risk factors**

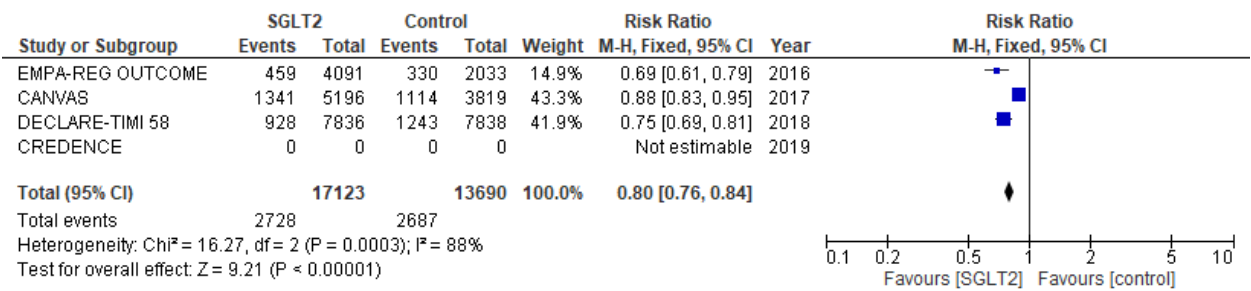

Supplement: Supplementary file 1 [file 18800642]
